# Supplementary material for: Synthesis of Magneto-Controllable Polymer Nanocarrier Based on Poly(N-isopropylacrylamide-co-acrylic Acid) for Doxorubicin Immobilization
Source: MDPI journal article supplement (doi:10.3390/polym14245440), 2022-12-12
Supplement: s1 [file s1]

## Article

# Synthesis of Magneto-Controllable Polymer Nanocarrier Based on Poly(N-isopropylacrylamide-co-acrylic Acid) for Doxorubicin Immobilization

Viktoria S. Kusaia <sup>1</sup>, Elena Yu. Kozhunova <sup>1,2,\*</sup>, Darya A. Stepanova <sup>1</sup>, Vladislava A. Pigareva <sup>1</sup>, Andrey V. Sybachin <sup>1</sup>, Sergey B. Zezin <sup>1</sup>, Anastasiya V. Bolshakova <sup>1</sup>, Nikita M. Shchelkunov <sup>2</sup>, Evgeny S. Vavaev <sup>2</sup>, Evgeny V. Lyubin <sup>2</sup>, Andrey A. Fedyanin <sup>2</sup> and Vasiliy V. Spiridonov <sup>1</sup>

Small unilamellar liposomes were prepared by sonication technique. The weighted amounts of electroneutral dioleoylphosphatidylcholine (DOPC) and anionic dioleoylphosphatidylglycerol (DOPG) were dissolved in methanol/chlorophorm mixture so that the molar fraction of the anionic lipid  $[DOPG]/([DOPC]+[DOPG])$  was 0.3. Then the organic solvent was evaporated on Laborota vacuum rotor evaporator. The resulted thin lipid film was dispersed in 0.01 M Tris buffer with a pH of 7.0. The freshly formed suspension was subjected to sonication of Cole-Parmer CP-750 tip ultrasonicator for the two 5-min cycles. The titanium tip dust was separated from the sample of the prepared liposomes by centrifugation on Eppendorf Mini-spin centrifuge with 10 000 rpm for the 5 min. The average size of the liposomes was 50 nm. The average electrophoretic mobility of the liposomes was  $-3 (\mu\text{m/s})/(\text{V/cm})$ . The samples were used within one day after preparation.

Biomimetic lipid membranes (model cell membranes) were prepared by the following technique. The 2 mg of 5 microns borosilicate beads from Duke Scientific (USA) were dispersed on 1 ml of ethanol and then separated from ethanol by centrifugation. Washed with ethanol beads were dispersed in 1 ml of 1 M KOH solution and then separated by centrifugation. Washed beads were rinsed with DI water and Tris buffer to clean the surface. Then 2 mg of beads in 1 ml Tris buffer were mixed with suspension of freshly prepared by sonication technique small unilamellar anionic DOPG/DOPC liposomes with molar fraction of DOPG 0.3 (concentration of liposomes was 0.4 mg/ml) on Biosan vortex with of 600 rpm during 30 min. Then non-reacted liposomes were separated by centrifugation and the beads with supported lipid membrane (BSLM) were obtained.

The 100% coverage of the beads surface was controlled with the use liposomes labeled with rhodamine modified lipid dioleoylphosphoethanolamine (Rh-DOPE). The images of BSLMs in optical microscope and fluorescent microscope (using the filter with  $\lambda_{\text{ex}} = 460\text{--}550 \text{ nm}$ ) are presented on Figure S1. No fluorescent signal was detected for uncovered microspheres. For the BSLMs the red fluorescence of the whole surface of the beads was observed.

## Materials

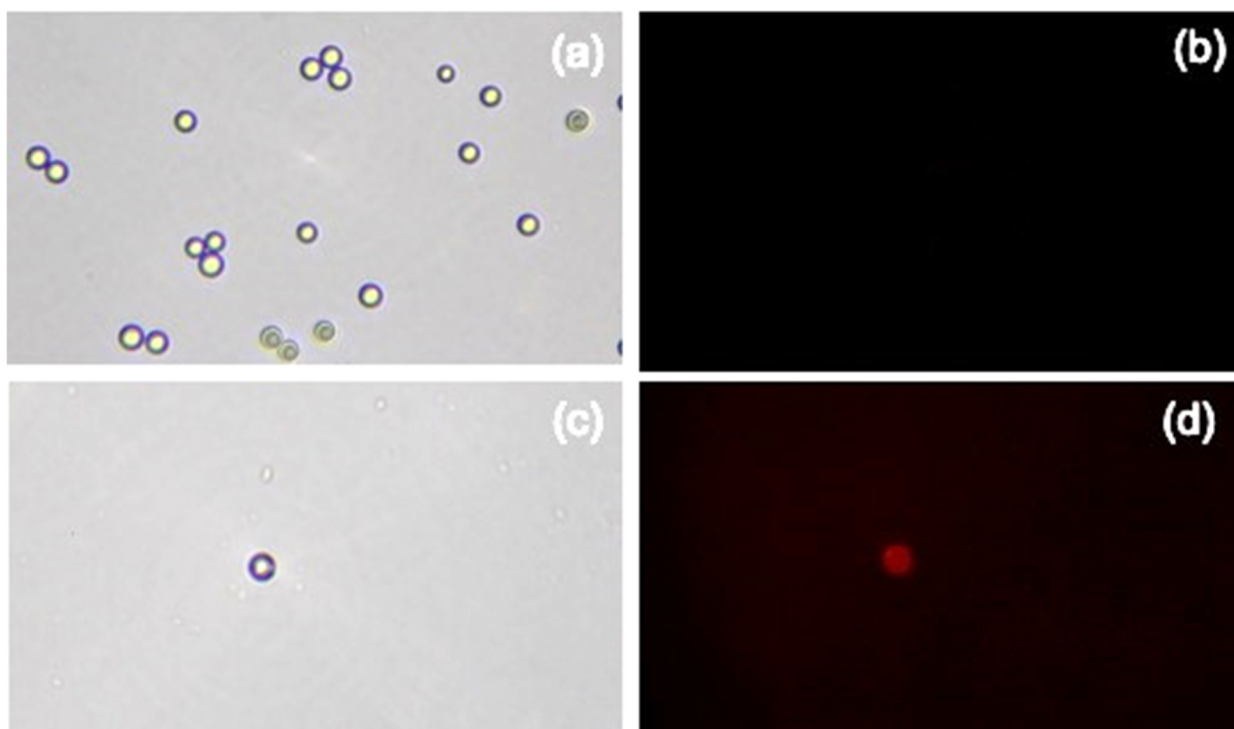

**Figure S1.** Images of the initial borosilicate beads (a,b) and covered with DOPC/DOPG/Rh-DOPE bilayer (c,d) in optical (a,c) and fluorescent microscope (b,d). Fluorescence excitation filter with  $\lambda_{ex}$  = 460-550 nm (b,d).

## Results

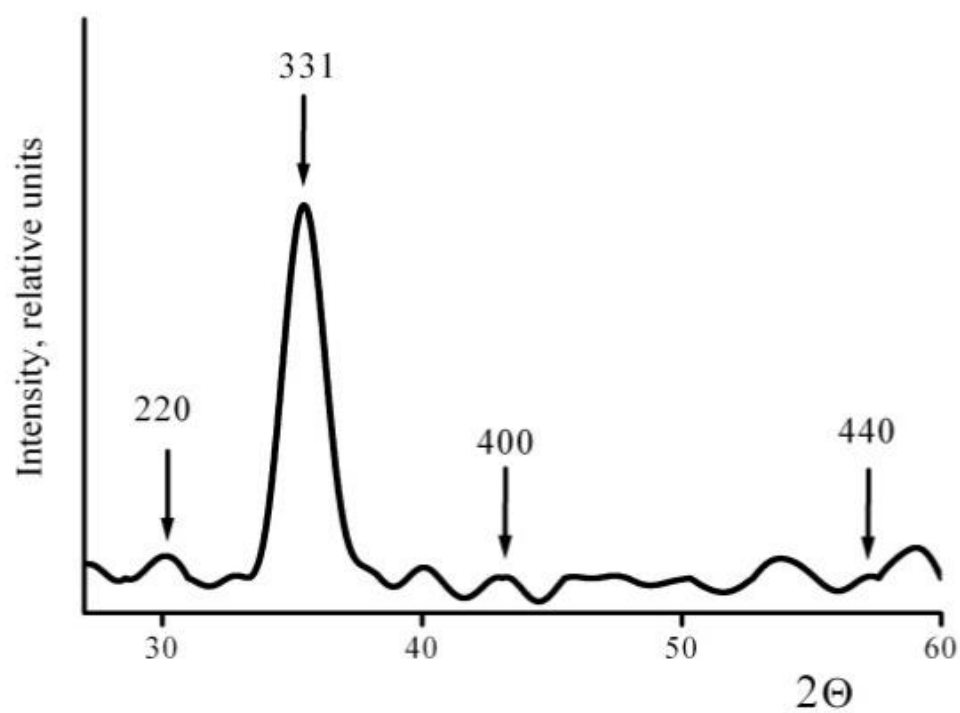

**Figure S2.** The XRD-pattern of the iron containing nanocarrier based on PNIPAM-PAA.

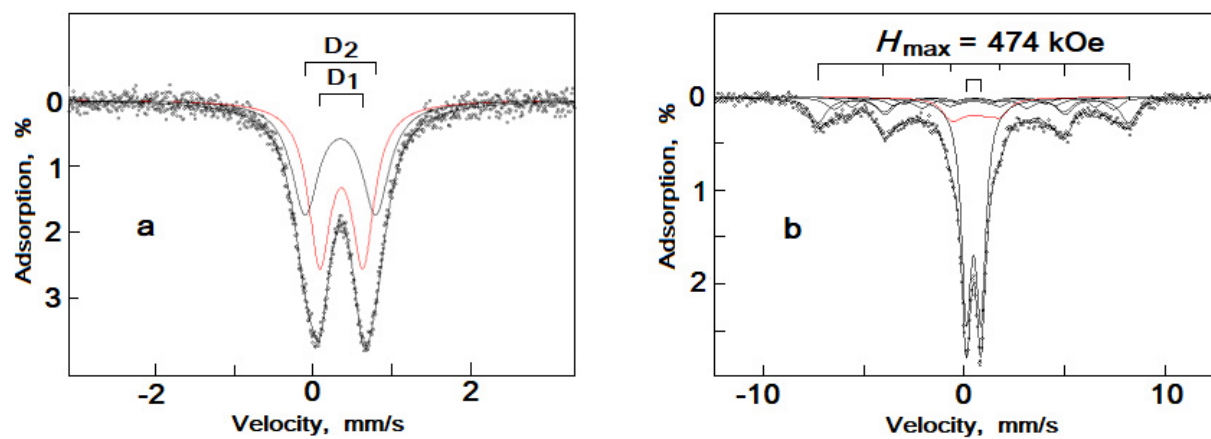

**Figure S3.** Mössbauer spectrum of iron-containing nanocarrier based on NIPAM-PAA.
